# Supplementary material
Source: PubMed Central journal article supplement (PMC4493751)

Supplemental Fig. S1

**a**, Rad53 phosphorylation in response to a unrepaired DSB break . G1 cells of strain JKM179 were arrested by  $\alpha$ -factor were released into galactose-containing medium to induce expression of HO endonuclease. The DSB at *MAT* cannot be repaired by homologous recombination. Checkpoint activation was monitored by Rad53 hyperphosphorylation on a Western blot. A control strain, treated the same way, carries a *MATa-inc* mutation that cannot be cleaved. FACS analysis is shown. **b**, Chromatin immunoprecipitation (ChIP) of RPA and Rad51 at DSB ends in cells at different stages of the cell cycle. Experimental details are described in Fig 3b. **c**, ChIP of Mre11 bound to DSB ends in nocodazole-arrested G2 cells, after induction of a DSB. **d**, ChIP of RPA and Rad51 at both *MAT* and the donor *HML* during induction of *MAT* switching in cells in which CDK1 was inhibited at the times indicated. These data are shown graphically in Fig. 5b. **e**, New DNA synthesis primed by the 3' end of *MAT* after strand invasion into the donor *HML $\alpha$*  locus was measured by PCR using the primers indicated in Fig. 5d.

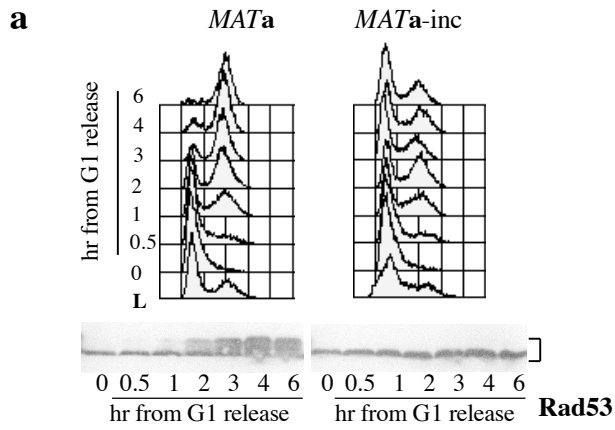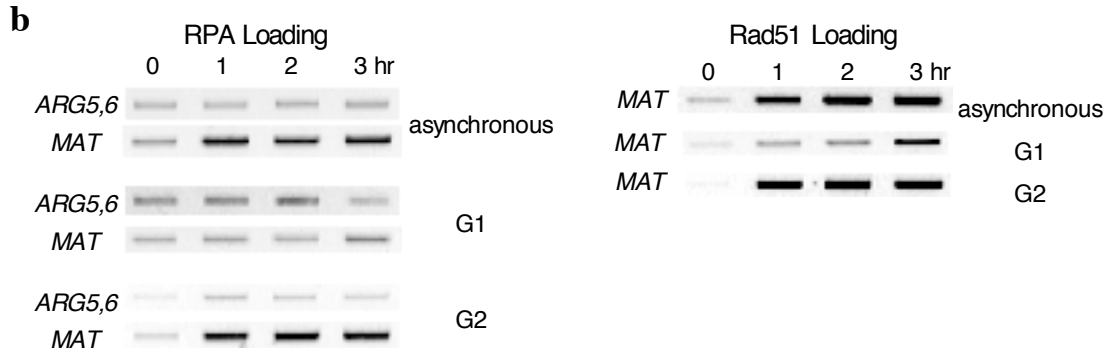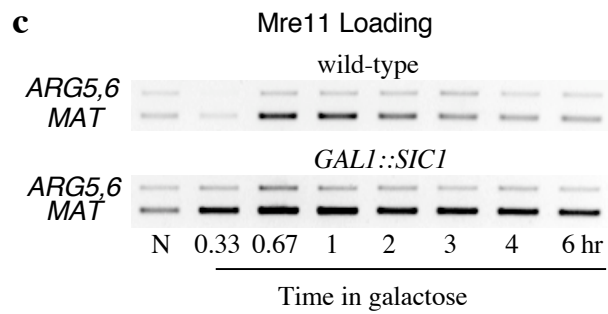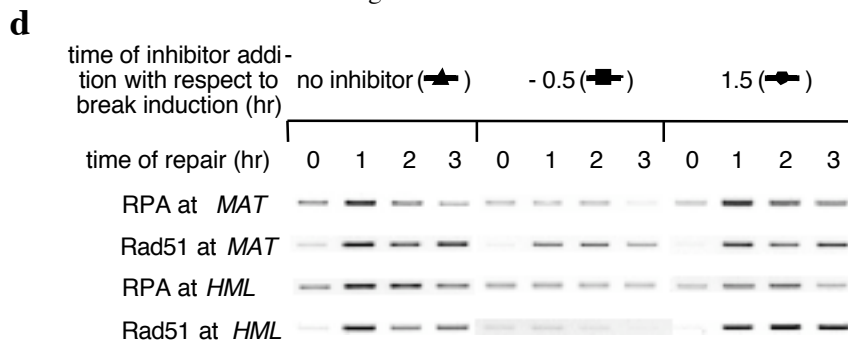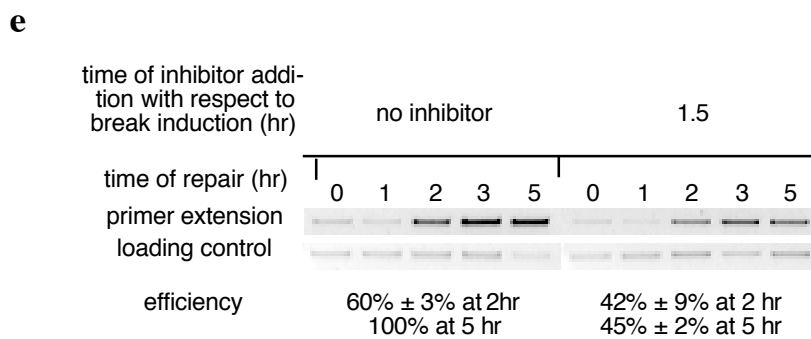

Supplement: NIHMS704492-supplement-s1.pdf [file NIHMS704492-supplement-s1.pdf]
